# Supplementary material for: Comparative analysis of symptom profile and risk of death associated with infection by SARS-CoV-2 and its variants in Hong Kong
Source: bioRxiv or medRxiv preprint supplement (doi:10.1101/2023.05.25.23289996), 2023-05-28
Supplement: Supplementary file [file media-1.pdf]

## SUPPLEMENTARY MATERIALS

**Table S1.** Methodological details on the iterative multi-tier text-matching algorithm

| Tier | Procedures                                                                                                                                                                                                                                                                                                                                                                                                                                                                                                                                                                                                                                                                                                                                                              |
|------|-------------------------------------------------------------------------------------------------------------------------------------------------------------------------------------------------------------------------------------------------------------------------------------------------------------------------------------------------------------------------------------------------------------------------------------------------------------------------------------------------------------------------------------------------------------------------------------------------------------------------------------------------------------------------------------------------------------------------------------------------------------------------|
| 1    | Text containing only words indicative of asymptomatic status were removed. We also standardized all Chinese Judou marks for easy identification of separate symptoms. All double quotes were replcaed with a single quote and doubles spaces with a single space.                                                                                                                                                                                                                                                                                                                                                                                                                                                                                                       |
| 2    | Non-exhaustive removal of phrases fulfilling one of the following conditions: <ul style="list-style-type: none"> <li>● Text that induced subsequent false positive symptom mapping (identification)</li> <li>● Text that mentioned existing health conditions or past medical history</li> <li>● Symptoms that referred to persons other than the patient</li> <li>● Symptoms that mentioned non-specific body parts</li> <li>● Text gave unclear indication of any symptom</li> <li>● Text unrelated to symptoms (for example, asking for sick leave certificate)</li> <li>● Inconclusive phrases about body temperature</li> <li>● Ambiguous body parts mentioned only</li> <li>● Adjectives or generalizable conditions without any mention of body parts</li> </ul> |
| 3    | Individual matching for phrases which were not suitable for global matching or contained patterns which were hard to generalize. For example, short-hand notations which caused false positive errors, and temperature descriptions ending with the cut-off digits.                                                                                                                                                                                                                                                                                                                                                                                                                                                                                                     |
| 4    | Exact matching for fever or temperature with a clear indicator of minimum or maximum threshold                                                                                                                                                                                                                                                                                                                                                                                                                                                                                                                                                                                                                                                                          |
| 5    | Exact matching for fever or temperature under the absence of specified phrases about a minimum or maximum threshold                                                                                                                                                                                                                                                                                                                                                                                                                                                                                                                                                                                                                                                     |
| 6    | Removal of negative descriptions, such as “no”, “not”, “don’t” and “afebrile” (and their Chinese equivalents)                                                                                                                                                                                                                                                                                                                                                                                                                                                                                                                                                                                                                                                           |
| 7    | Prioritized matching of selected symptom phrases to avoid subsequent false positive errors                                                                                                                                                                                                                                                                                                                                                                                                                                                                                                                                                                                                                                                                              |
| 8    | Matching of symptom phrases under strict definitions                                                                                                                                                                                                                                                                                                                                                                                                                                                                                                                                                                                                                                                                                                                    |
| 9    | Matching of symptom phrases under less strict definitions                                                                                                                                                                                                                                                                                                                                                                                                                                                                                                                                                                                                                                                                                                               |
| 10   | Matching of symptom phrases under strict definitions and under the following conditions: <ul style="list-style-type: none"> <li>● absence of certain phrases to avoid false positives; and/or</li> <li>● matches a whole word (a standalone term).</li> </ul>                                                                                                                                                                                                                                                                                                                                                                                                                                                                                                           |
| 11   | Manual screening of the residual symptoms text to look up meaningful descriptions, which would then be used to update tiers 2-10 as appropriate.                                                                                                                                                                                                                                                                                                                                                                                                                                                                                                                                                                                                                        |

Remarks: Tiers 1-11 are iterative until no meaningful descriptions could be observed from the residual text in Tier 10. An anonymous sample dataset was uploaded to show the data structure of this study [1].

**Table S2.** Prevalence of symptoms among COVID-19 cases stratified by vaccination status and variants. Symptoms with a combined prevalence of >0.5% are highlighted.

| Symptom                           | Unvaccinated          |                  |                             | Vaccinated       |                             |
|-----------------------------------|-----------------------|------------------|-----------------------------|------------------|-----------------------------|
|                                   | Wild type<br>n= 1,175 | Delta<br>n= 95   | Omicron (BA.2)<br>n= 12,677 | Delta<br>n= 151  | Omicron (BA.2)<br>n= 54,129 |
| <b>General symptoms</b>           |                       |                  |                             |                  |                             |
| Bodyache                          | 0.00 (0.00-0.33)      | 0.00 (0.00-3.89) | 0.49 (0.38-0.63)            | 0.00 (0.00-2.48) | 0.81 (0.74-0.89)            |
| Chills                            | 2.13 (1.45-3.12)      | 0.00 (0.00-3.89) | 1.82 (1.60-2.07)            | 0.66 (0.12-3.66) | 1.93 (1.81-2.05)            |
| Fatigue                           | 0.94 (0.52-1.67)      | 2.11 (0.58-7.35) | 1.86 (1.64-2.11)            | 1.99 (0.68-5.68) | 1.61 (1.50-1.71)            |
| Fever                             | 37.2 (34.5-40.0)      | 25.3 (17.6-34.8) | 36.2 (35.4-37.1)            | 17.9 (12.6-24.8) | 19.2 (18.9-19.6)            |
| Malaise                           | 2.47 (1.72-3.52)      | 0.00 (0.00-3.89) | 0.09 (0.05-0.17)            | 2.65 (1.03-6.61) | 0.12 (0.09-0.15)            |
| Sweating                          | 0.09 (0.02-0.48)      | 0.00 (0.00-3.89) | 0.05 (0.02-0.10)            | 0.00 (0.00-2.48) | 0.04 (0.03-0.07)            |
| <b>Nervous system</b>             |                       |                  |                             |                  |                             |
| Confusion                         | 0.09 (0.02-0.48)      | 0.00 (0.00-3.89) | 0.03 (0.01-0.08)            | 0.00 (0.00-2.48) | 0.01 (0.00-0.02)            |
| Convulsion                        | 0.00 (0.00-0.33)      | 0.00 (0.00-3.89) | 0.01 (0.00-0.04)            | 0.00 (0.00-2.48) | 0.00 (0.00-0.01)            |
| Disturbance of taste and/or smell | 6.38 (5.12-7.93)      | 1.05 (0.19-5.72) | 0.21 (0.15-0.31)            | 6.62 (3.64-11.8) | 0.26 (0.22-0.31)            |
| Dizziness                         | 0.77 (0.40-1.45)      | 2.11 (0.58-7.35) | 1.05 (0.89-1.24)            | 3.31 (1.42-7.52) | 0.84 (0.77-0.92)            |
| Drowsiness                        | 0.00 (0.00-0.33)      | 0.00 (0.00-3.89) | 0.02 (0.00-0.06)            | 0.00 (0.00-2.48) | 0.03 (0.02-0.04)            |
| Headache                          | 8.85 (7.36-10.6)      | 13.7 (8.17-22.0) | 4.96 (4.60-5.35)            | 14.6 (9.82-21.1) | 6.08 (5.89-6.29)            |
| Insomnia                          | 0.00 (0.00-0.33)      | 0.00 (0.00-3.89) | 0.03 (0.01-0.08)            | 0.00 (0.00-2.48) | 0.03 (0.02-0.04)            |
| Neuralgia                         | 0.00 (0.00-0.33)      | 0.00 (0.00-3.89) | 0.00 (0.00-0.03)            | 0.00 (0.00-2.48) | 0.01 (0.00-0.02)            |
| Numbness                          | 0.00 (0.00-0.33)      | 0.00 (0.00-3.89) | 0.02 (0.00-0.06)            | 0.00 (0.00-2.48) | 0.01 (0.01-0.02)            |
| Unsteadiness                      | 0.00 (0.00-0.33)      | 0.00 (0.00-3.89) | 0.01 (0.00-0.04)            | 0.00 (0.00-2.48) | 0.00 (0.00-0.01)            |
| <b>Respiratory system</b>         |                       |                  |                             |                  |                             |
| Blocked nose                      | 2.04 (1.38-3.02)      | 0.00 (0.00-3.89) | 0.91 (0.76-1.09)            | 3.97 (1.83-8.40) | 1.88 (1.76-1.99)            |
| Breathing problem                 | 0.00 (0.00-0.33)      | 0.00 (0.00-3.89) | 0.01 (0.00-0.04)            | 0.00 (0.00-2.48) | 0.02 (0.01-0.04)            |
| Breathing sound (stridor)         | 0.00 (0.00-0.33)      | 0.00 (0.00-3.89) | 0.01 (0.00-0.04)            | 0.00 (0.00-2.48) | 0.00 (0.00-0.01)            |
| Chest discomfort                  | 0.09 (0.02-0.48)      | 1.05 (0.19-5.72) | 0.06 (0.03-0.11)            | 0.66 (0.12-3.66) | 0.02 (0.01-0.04)            |
| Chest pain                        | 0.43 (0.18-0.99)      | 0.00 (0.00-3.89) | 2.03 (1.80-2.29)            | 1.99 (0.68-5.68) | 2.49 (2.36-2.63)            |
| Coryza (cold-like symptoms)       | 0.00 (0.00-0.33)      | 0.00 (0.00-3.89) | 0.48 (0.37-0.62)            | 0.00 (0.00-2.48) | 0.91 (0.83-0.99)            |
| Cough                             | 37.6 (34.9-40.4)      | 38.9 (29.8-49.0) | 22.5 (21.8-23.3)            | 47.0 (39.2-55.0) | 26.6 (26.2-27.0)            |
| Influenza-like illness            | 0.00 (0.00-0.33)      | 0.00 (0.00-3.89) | 0.05 (0.02-0.10)            | 0.00 (0.00-2.48) | 0.05 (0.04-0.07)            |
| Nose bleed                        | 0.00 (0.00-0.33)      | 0.00 (0.00-3.89) | 0.01 (0.00-0.04)            | 0.00 (0.00-2.48) | 0.01 (0.00-0.02)            |
| Nose dryness                      | 0.00 (0.00-0.33)      | 0.00 (0.00-3.89) | 0.00 (0.00-0.03)            | 0.00 (0.00-2.48) | 0.00 (0.00-0.01)            |
| Pneumonia                         | 0.00 (0.00-0.33)      | 0.00 (0.00-3.89) | 0.06 (0.03-0.11)            | 0.00 (0.00-2.48) | 0.00 (0.00-0.01)            |
| Respiratory tract infection       | 0.00 (0.00-0.33)      | 0.00 (0.00-3.89) | 0.02 (0.00-0.06)            | 0.00 (0.00-2.48) | 0.02 (0.01-0.04)            |
| Runny nose                        | 8.68 (7.20-10.4)      | 20.0 (13.2-29.1) | 8.16 (7.70-8.65)            | 33.1 (26.1-41.0) | 10.8 (10.5-11.0)            |
| Shortness of breath               | 5.19 (4.06-6.61)      | 3.16 (1.08-8.88) | 3.73 (3.42-4.08)            | 1.99 (0.68-5.68) | 3.84 (3.68-4.00)            |
| Sinus pain                        | 0.00 (0.00-0.33)      | 0.00 (0.00-3.89) | 0.00 (0.00-0.03)            | 0.00 (0.00-2.48) | 0.00 (0.00-0.01)            |
| Sneezing                          | 0.09 (0.02-0.48)      | 0.00 (0.00-3.89) | 0.17 (0.11-0.25)            | 0.00 (0.00-2.48) | 0.28 (0.24-0.33)            |
| Sputum (expectoration)            | 1.79 (1.17-2.72)      | 3.16 (1.08-8.88) | 3.09 (2.80-3.41)            | 1.99 (0.68-5.68) | 3.67 (3.52-3.83)            |
| Voice disorders                   | 0.00 (0.00-0.33)      | 0.00 (0.00-3.89) | 0.29 (0.21-0.40)            | 0.00 (0.00-2.48) | 0.50 (0.44-0.56)            |
| <b>Digestive system</b>           |                       |                  |                             |                  |                             |
| Abdominal pain                    | 0.17 (0.05-0.62)      | 0.00 (0.00-3.89) | 0.50 (0.40-0.64)            | 0.00 (0.00-2.48) | 0.14 (0.11-0.17)            |
| Constipation                      | 0.00 (0.00-0.33)      | 0.00 (0.00-3.89) | 0.02 (0.01-0.07)            | 0.00 (0.00-2.48) | 0.00 (0.00-0.01)            |
| Diarrhea                          | 4.94 (3.84-6.33)      | 4.21 (1.65-10.3) | 1.84 (1.62-2.09)            | 0.66 (0.12-3.66) | 0.82 (0.75-0.90)            |
| Dry mouth                         | 0.17 (0.05-0.62)      | 0.00 (0.00-3.89) | 0.13 (0.08-0.21)            | 0.66 (0.12-3.66) | 0.13 (0.10-0.16)            |
| Dry throat                        | 0.17 (0.05-0.62)      | 0.00 (0.00-3.89) | 0.38 (0.29-0.50)            | 3.97 (1.83-8.40) | 0.79 (0.72-0.87)            |
| Dysphagia                         | 0.00 (0.00-0.33)      | 0.00 (0.00-3.89) | 0.00 (0.00-0.03)            | 0.00 (0.00-2.48) | 0.01 (0.01-0.03)            |

|                           |                         |                         |                         |  |                         |                         |
|---------------------------|-------------------------|-------------------------|-------------------------|--|-------------------------|-------------------------|
| Excessive saliva          | 0.00 (0.00-0.33)        | 0.00 (0.00-3.89)        | 0.00 (0.00-0.03)        |  | 0.00 (0.00-2.48)        | 0.00 (0.00-0.01)        |
| <b>Itchy throat</b>       | <b>0.09 (0.02-0.48)</b> | <b>2.11 (0.58-7.35)</b> | <b>0.43 (0.33-0.56)</b> |  | <b>1.99 (0.68-5.68)</b> | <b>0.88 (0.80-0.96)</b> |
| Lip swelling              | 0.00 (0.00-0.33)        | 0.00 (0.00-3.89)        | 0.00 (0.00-0.03)        |  | 0.00 (0.00-2.48)        | 0.00 (0.00-0.01)        |
| <b>Loss of appetite</b>   | <b>0.17 (0.05-0.62)</b> | <b>0.00 (0.00-3.89)</b> | <b>0.35 (0.26-0.47)</b> |  | <b>0.00 (0.00-2.48)</b> | <b>0.06 (0.05-0.09)</b> |
| Mouth discomfort          | 0.00 (0.00-0.33)        | 0.00 (0.00-3.89)        | 0.00 (0.00-0.03)        |  | 0.00 (0.00-2.48)        | 0.00 (0.00-0.01)        |
| Mouth pain                | 0.00 (0.00-0.33)        | 0.00 (0.00-3.89)        | 0.04 (0.02-0.09)        |  | 0.00 (0.00-2.48)        | 0.03 (0.02-0.05)        |
| <b>Nausea or vomiting</b> | <b>0.68 (0.35-1.34)</b> | <b>1.05 (0.19-5.72)</b> | <b>2.54 (2.28-2.83)</b> |  | <b>1.32 (0.36-4.70)</b> | <b>0.51 (0.46-0.58)</b> |
| <b>Sore throat</b>        | <b>15.0 (13.1-17.1)</b> | <b>18.9 (12.3-28.0)</b> | <b>16.0 (15.3-16.6)</b> |  | <b>29.1 (22.5-36.8)</b> | <b>25.0 (24.6-25.4)</b> |
| <b>Throat discomfort</b>  | <b>1.53 (0.97-2.41)</b> | <b>1.05 (0.19-5.72)</b> | <b>0.28 (0.21-0.39)</b> |  | <b>0.66 (0.12-3.66)</b> | <b>0.59 (0.53-0.66)</b> |
| Throat irritation         | 0.00 (0.00-0.33)        | 0.00 (0.00-3.89)        | 0.00 (0.00-0.03)        |  | 0.00 (0.00-2.48)        | 0.01 (0.00-0.02)        |
| Tongue pain               | 0.00 (0.00-0.33)        | 0.00 (0.00-3.89)        | 0.00 (0.00-0.03)        |  | 0.00 (0.00-2.48)        | 0.01 (0.00-0.02)        |
| Tonsillitis               | 0.00 (0.00-0.33)        | 0.00 (0.00-3.89)        | 0.02 (0.00-0.06)        |  | 0.00 (0.00-2.48)        | 0.01 (0.01-0.03)        |
| Toothache                 | 0.00 (0.00-0.33)        | 0.00 (0.00-3.89)        | 0.00 (0.00-0.03)        |  | 0.00 (0.00-2.48)        | 0.01 (0.01-0.02)        |

### Circulatory system

|                          |                         |                         |                         |  |                         |                         |
|--------------------------|-------------------------|-------------------------|-------------------------|--|-------------------------|-------------------------|
| Collapse                 | 0.09 (0.02-0.48)        | 0.00 (0.00-3.89)        | 0.00 (0.00-0.03)        |  | 0.00 (0.00-2.48)        | 0.00 (0.00-0.01)        |
| Heart discomfort         | 0.00 (0.00-0.33)        | 0.00 (0.00-3.89)        | 0.00 (0.00-0.03)        |  | 0.00 (0.00-2.48)        | 0.00 (0.00-0.01)        |
| Irregular blood pressure | 0.00 (0.00-0.33)        | 0.00 (0.00-3.89)        | 0.02 (0.01-0.07)        |  | 0.00 (0.00-2.48)        | 0.02 (0.01-0.04)        |
| Lymphadenopathy          | 0.00 (0.00-0.33)        | 0.00 (0.00-3.89)        | 0.00 (0.00-0.03)        |  | 0.00 (0.00-2.48)        | 0.00 (0.00-0.01)        |
| <b>Palpitations</b>      | <b>0.00 (0.00-0.33)</b> | <b>0.00 (0.00-3.89)</b> | <b>0.02 (0.01-0.07)</b> |  | <b>0.66 (0.12-3.66)</b> | <b>0.02 (0.01-0.04)</b> |
| Tachycardia              | 0.00 (0.00-0.33)        | 0.00 (0.00-3.89)        | 0.05 (0.02-0.10)        |  | 0.00 (0.00-2.48)        | 0.03 (0.02-0.05)        |

### Musculoskeletal system

|                                |                         |                         |                         |  |                         |                         |
|--------------------------------|-------------------------|-------------------------|-------------------------|--|-------------------------|-------------------------|
| <b>Back pain</b>               | <b>0.26 (0.09-0.75)</b> | <b>0.00 (0.00-3.89)</b> | <b>0.21 (0.15-0.31)</b> |  | <b>0.66 (0.12-3.66)</b> | <b>0.20 (0.16-0.24)</b> |
| Face and/or neck pain          | 0.00 (0.00-0.33)        | 0.00 (0.00-3.89)        | 0.02 (0.01-0.07)        |  | 0.00 (0.00-2.48)        | 0.01 (0.01-0.03)        |
| Face and/or neck stiffness     | 0.00 (0.00-0.33)        | 0.00 (0.00-3.89)        | 0.01 (0.00-0.04)        |  | 0.00 (0.00-2.48)        | 0.00 (0.00-0.01)        |
| Face and/or neck swelling      | 0.00 (0.00-0.33)        | 0.00 (0.00-3.89)        | 0.00 (0.00-0.03)        |  | 0.00 (0.00-2.48)        | 0.00 (0.00-0.01)        |
| Lowerextremity coldness        | 0.00 (0.00-0.33)        | 0.00 (0.00-3.89)        | 0.01 (0.00-0.04)        |  | 0.00 (0.00-2.48)        | 0.02 (0.01-0.03)        |
| Lowerextremity cramp           | 0.00 (0.00-0.33)        | 0.00 (0.00-3.89)        | 0.01 (0.00-0.04)        |  | 0.00 (0.00-2.48)        | 0.00 (0.00-0.01)        |
| Lowerextremity pain            | 0.00 (0.00-0.33)        | 0.00 (0.00-3.89)        | 0.13 (0.08-0.21)        |  | 0.00 (0.00-2.48)        | 0.09 (0.07-0.12)        |
| Lowerextremity swelling        | 0.09 (0.02-0.48)        | 0.00 (0.00-3.89)        | 0.00 (0.00-0.03)        |  | 0.00 (0.00-2.48)        | 0.00 (0.00-0.01)        |
| <b>Ostalgia</b>                | <b>0.17 (0.05-0.62)</b> | <b>0.00 (0.00-3.89)</b> | <b>0.45 (0.35-0.58)</b> |  | <b>0.00 (0.00-2.48)</b> | <b>0.70 (0.64-0.78)</b> |
| Unspecified joint pain         | 0.09 (0.02-0.48)        | 0.00 (0.00-3.89)        | 0.21 (0.15-0.31)        |  | 0.00 (0.00-2.48)        | 0.14 (0.11-0.17)        |
| Unspecified joint stiffness    | 0.00 (0.00-0.33)        | 0.00 (0.00-3.89)        | 0.00 (0.00-0.03)        |  | 0.00 (0.00-2.48)        | 0.00 (0.00-0.01)        |
| Unspecified limb pain          | 0.00 (0.00-0.33)        | 0.00 (0.00-3.89)        | 0.00 (0.00-0.03)        |  | 0.00 (0.00-2.48)        | 0.00 (0.00-0.01)        |
| <b>Unspecified muscle pain</b> | <b>2.81 (2.01-3.92)</b> | <b>1.05 (0.19-5.72)</b> | <b>1.59 (1.38-1.82)</b> |  | <b>3.31 (1.42-7.52)</b> | <b>1.92 (1.80-2.03)</b> |
| Unspecified muscle stiffness   | 0.00 (0.00-0.33)        | 0.00 (0.00-3.89)        | 0.00 (0.00-0.03)        |  | 0.00 (0.00-2.48)        | 0.00 (0.00-0.01)        |
| Upperextremity coldness        | 0.00 (0.00-0.33)        | 0.00 (0.00-3.89)        | 0.01 (0.00-0.04)        |  | 0.00 (0.00-2.48)        | 0.02 (0.01-0.03)        |
| Upperextremity cramp           | 0.00 (0.00-0.33)        | 0.00 (0.00-3.89)        | 0.01 (0.00-0.04)        |  | 0.00 (0.00-2.48)        | 0.00 (0.00-0.01)        |
| Upperextremity pain            | 0.00 (0.00-0.33)        | 0.00 (0.00-3.89)        | 0.06 (0.03-0.12)        |  | 0.00 (0.00-2.48)        | 0.09 (0.07-0.12)        |
| Weak joint(s)                  | 0.00 (0.00-0.33)        | 0.00 (0.00-3.89)        | 0.00 (0.00-0.03)        |  | 0.00 (0.00-2.48)        | 0.01 (0.00-0.02)        |
| Weak limb(s)                   | 0.00 (0.00-0.33)        | 0.00 (0.00-3.89)        | 0.14 (0.09-0.22)        |  | 0.00 (0.00-2.48)        | 0.17 (0.14-0.21)        |
| Weak muscle(s)                 | 0.00 (0.00-0.33)        | 0.00 (0.00-3.89)        | 0.01 (0.00-0.04)        |  | 0.00 (0.00-2.48)        | 0.02 (0.01-0.03)        |

### Urinary system

|                          |                  |                  |                  |  |                  |                  |
|--------------------------|------------------|------------------|------------------|--|------------------|------------------|
| Ambiguous urine problems | 0.00 (0.00-0.33) | 0.00 (0.00-3.89) | 0.00 (0.00-0.03) |  | 0.00 (0.00-2.48) | 0.00 (0.00-0.01) |
| Frequent urination       | 0.00 (0.00-0.33) | 0.00 (0.00-3.89) | 0.01 (0.00-0.04) |  | 0.00 (0.00-2.48) | 0.00 (0.00-0.01) |
| Incontinence of urine    | 0.00 (0.00-0.33) | 0.00 (0.00-3.89) | 0.00 (0.00-0.03) |  | 0.00 (0.00-2.48) | 0.00 (0.00-0.01) |
| Painful urination        | 0.00 (0.00-0.33) | 0.00 (0.00-3.89) | 0.01 (0.00-0.04) |  | 0.00 (0.00-2.48) | 0.00 (0.00-0.01) |
| Retention of urine       | 0.00 (0.00-0.33) | 0.00 (0.00-3.89) | 0.00 (0.00-0.03) |  | 0.00 (0.00-2.48) | 0.00 (0.00-0.01) |
| Scrotum pain             | 0.00 (0.00-0.33) | 0.00 (0.00-3.89) | 0.01 (0.00-0.04) |  | 0.00 (0.00-2.48) | 0.00 (0.00-0.01) |

### Other

|                        |                  |                  |                  |  |                  |                  |
|------------------------|------------------|------------------|------------------|--|------------------|------------------|
| Ambiguous ear problems | 0.00 (0.00-0.33) | 0.00 (0.00-3.89) | 0.01 (0.00-0.04) |  | 0.00 (0.00-2.48) | 0.00 (0.00-0.01) |
| Anxiety                | 0.00 (0.00-0.33) | 0.00 (0.00-3.89) | 0.00 (0.00-0.03) |  | 0.00 (0.00-2.48) | 0.00 (0.00-0.01) |
| Blisters               | 0.00 (0.00-0.33) | 0.00 (0.00-3.89) | 0.00 (0.00-0.03) |  | 0.00 (0.00-2.48) | 0.00 (0.00-0.01) |
| Blocked ear(s)         | 0.00 (0.00-0.33) | 0.00 (0.00-3.89) | 0.01 (0.00-0.04) |  | 0.00 (0.00-2.48) | 0.00 (0.00-0.01) |
| Blurred vision         | 0.00 (0.00-0.33) | 0.00 (0.00-3.89) | 0.01 (0.00-0.04) |  | 0.00 (0.00-2.48) | 0.01 (0.00-0.02) |

|                     |                  |                  |                  |  |                  |                  |
|---------------------|------------------|------------------|------------------|--|------------------|------------------|
| Eye discharge       | 0.00 (0.00-0.33) | 0.00 (0.00-3.89) | 0.00 (0.00-0.03) |  | 0.00 (0.00-2.48) | 0.02 (0.01-0.03) |
| Eye dryness         | 0.00 (0.00-0.33) | 0.00 (0.00-3.89) | 0.00 (0.00-0.03) |  | 0.00 (0.00-2.48) | 0.00 (0.00-0.01) |
| Eye itchiness       | 0.00 (0.00-0.33) | 0.00 (0.00-3.89) | 0.00 (0.00-0.03) |  | 0.00 (0.00-2.48) | 0.00 (0.00-0.01) |
| Eye lid issues      | 0.00 (0.00-0.33) | 0.00 (0.00-3.89) | 0.00 (0.00-0.03) |  | 0.00 (0.00-2.48) | 0.00 (0.00-0.01) |
| Eye pain            | 0.00 (0.00-0.33) | 0.00 (0.00-3.89) | 0.02 (0.01-0.07) |  | 0.00 (0.00-2.48) | 0.02 (0.01-0.04) |
| Feeling low         | 0.00 (0.00-0.33) | 0.00 (0.00-3.89) | 0.00 (0.00-0.03) |  | 0.00 (0.00-2.48) | 0.00 (0.00-0.01) |
| Hearing dysfunction | 0.00 (0.00-0.33) | 0.00 (0.00-3.89) | 0.02 (0.00-0.06) |  | 0.00 (0.00-2.48) | 0.03 (0.02-0.05) |
| Itchy ear(s)        | 0.00 (0.00-0.33) | 0.00 (0.00-3.89) | 0.00 (0.00-0.03) |  | 0.00 (0.00-2.48) | 0.00 (0.00-0.01) |
| Rash                | 0.00 (0.00-0.33) | 0.00 (0.00-3.89) | 0.06 (0.03-0.11) |  | 0.00 (0.00-2.48) | 0.03 (0.02-0.05) |
| Red eye(s)          | 0.00 (0.00-0.33) | 0.00 (0.00-3.89) | 0.02 (0.00-0.06) |  | 0.00 (0.00-2.48) | 0.01 (0.01-0.02) |
| Skin irritation     | 0.00 (0.00-0.33) | 0.00 (0.00-3.89) | 0.01 (0.00-0.04) |  | 0.00 (0.00-2.48) | 0.01 (0.00-0.02) |
| Sore ear(s)         | 0.00 (0.00-0.33) | 0.00 (0.00-3.89) | 0.05 (0.02-0.10) |  | 0.00 (0.00-2.48) | 0.06 (0.05-0.09) |

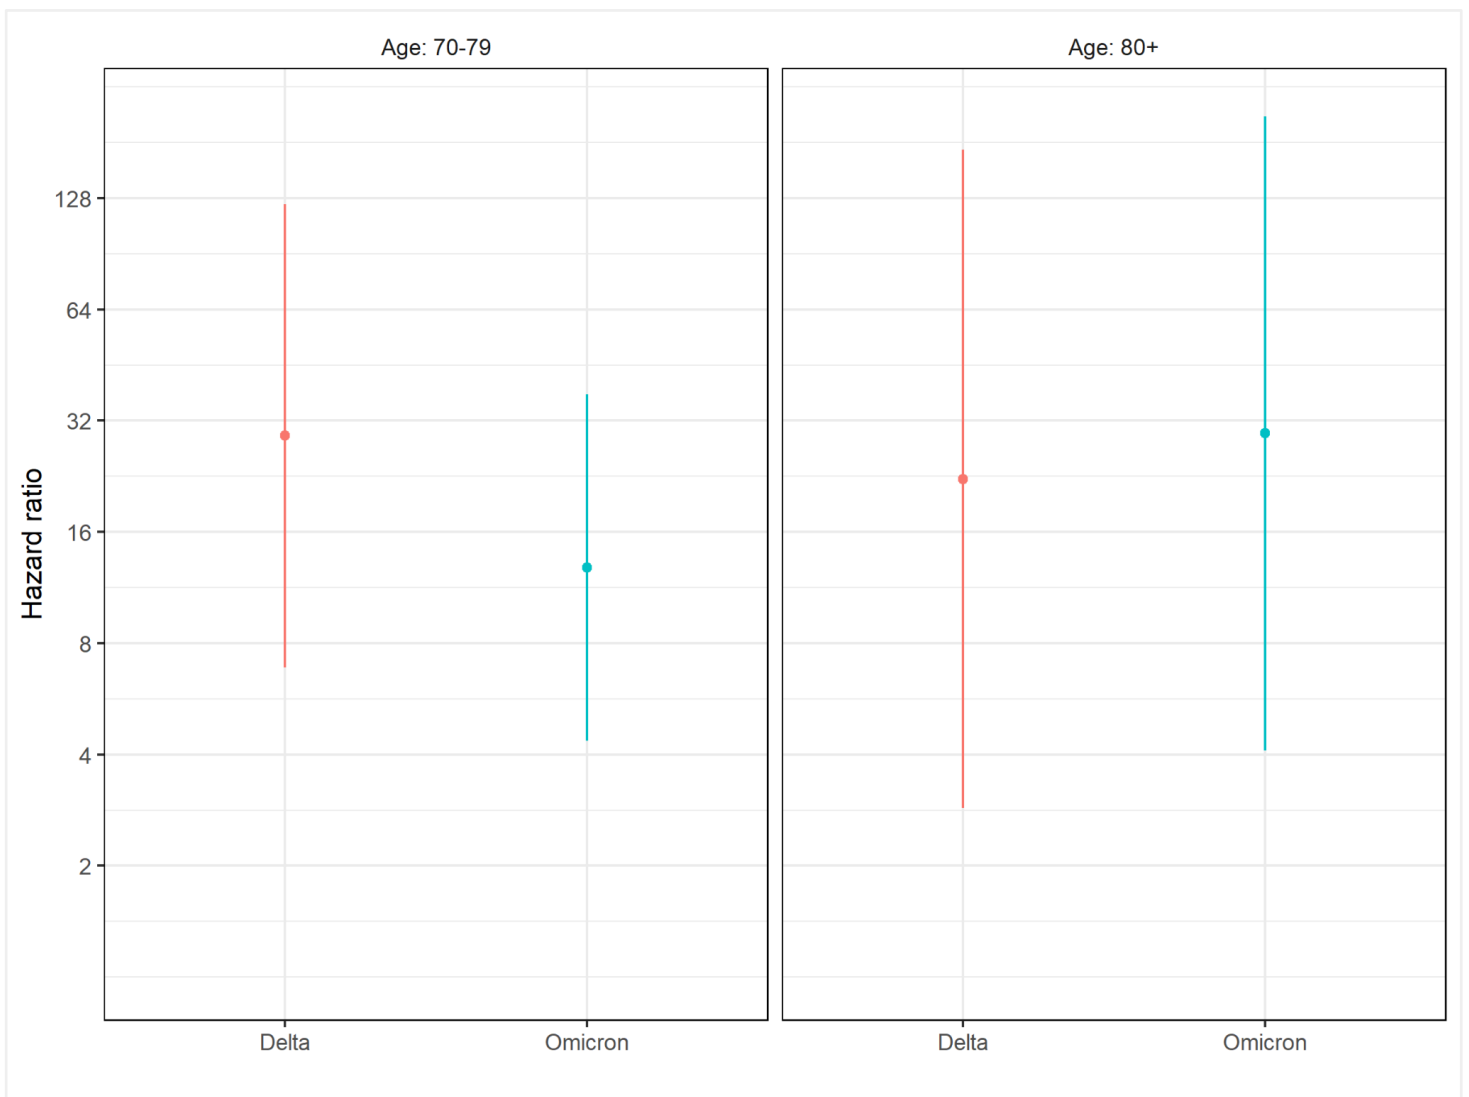

**Figure S1.** Adjusted hazard ratios of death within 28 days of onset for delta and omicron variants versus the wild-type among unvaccinated elderly cases aged 70 years or above.

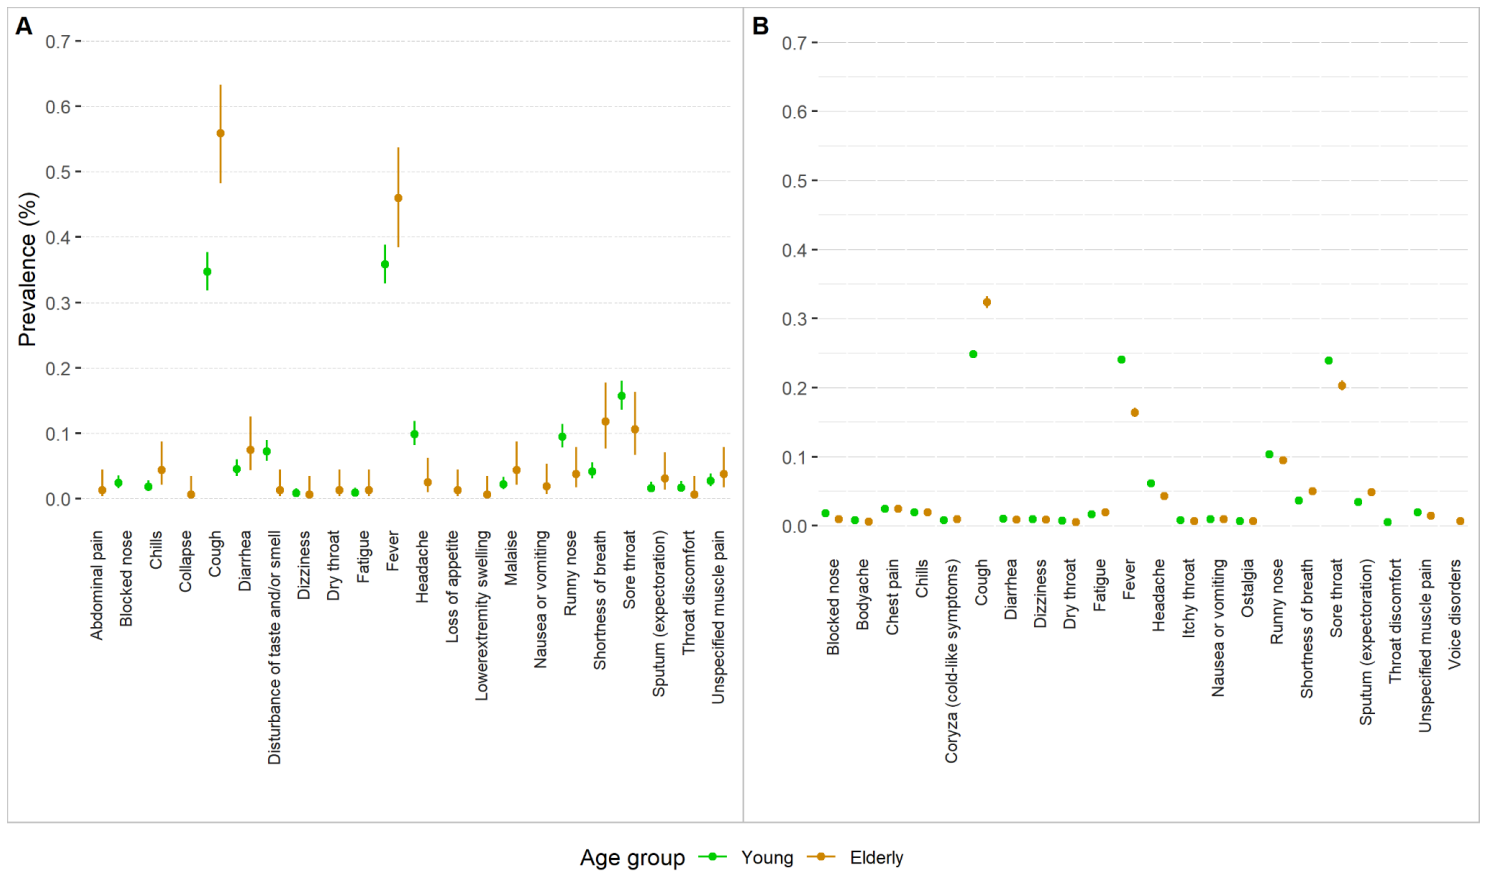

**Figure S2.** Prevalence of common symptoms among unvaccinated cases stratified by age group for (A) the wild type and (B) omicron BA.2 sub-variant. Vertical segments are 95% confidence intervals.

## Reference

1. Symptom profile for COVID-19 in Hong Kong [Internet]. Github; [cited 2023 May 13]. Available from: [https://github.com/kkokwok/symptom\\_profile](https://github.com/kkokwok/symptom_profile)
